# Supplementary figures and images for: Evaluation of Functionally Meaningful Measures for Clinical Trials of Cognition Enhancement in Schizophrenia
Source: Atypon-hosted journal article supplement (doi:10.1176/appi.ajp.2010.10030414), 2011-02-02

**FIGURE S1. Steps in the Validation of Intermediate Measures (VIM) Study Sponsored by MATRICS-CT**

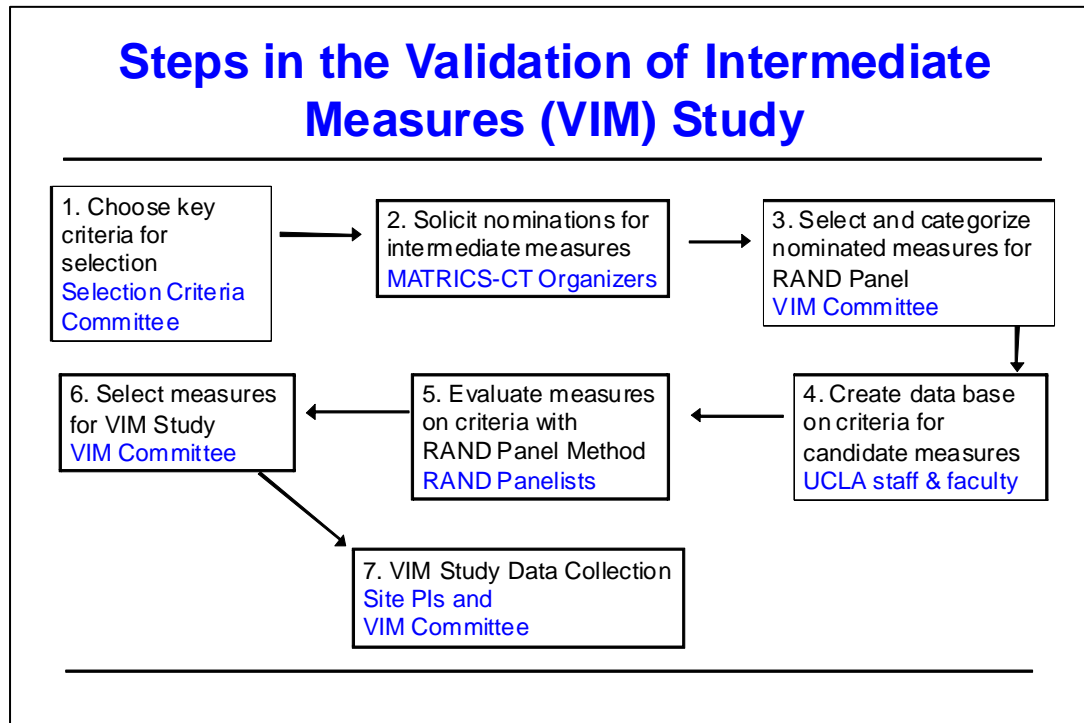

Supplement: ajp_168_04_400_01.pdf [file ajp_168_04_400_01.pdf]
